# Supplementary material for: Dissociation of Tissue Destruction and Bacterial Expansion during Bubonic Plague
Source: PubMed Central journal article supplement (PMC4615631; doi:10.1371/journal.ppat.1005222), 2015-10-20

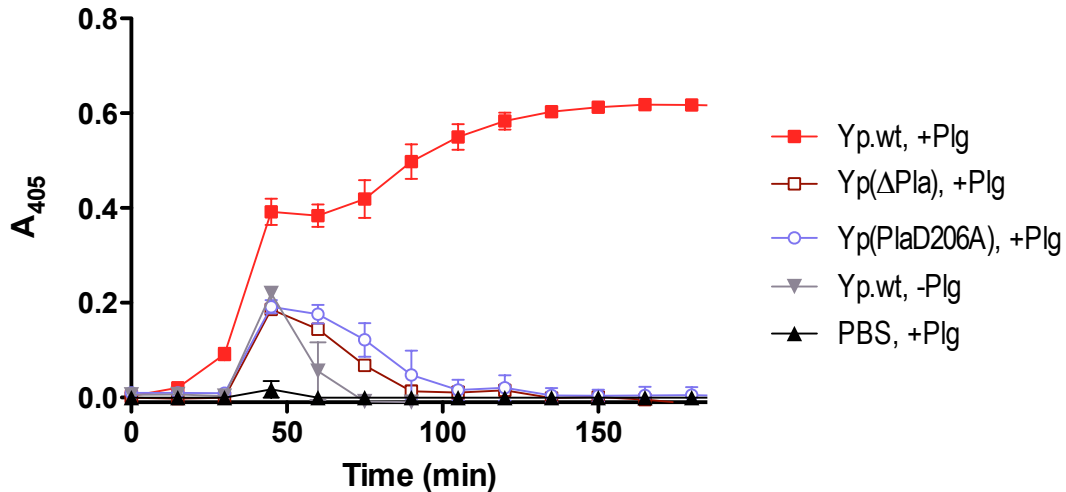

Supplement: ppat.1005222.s002.pdf [file ppat.1005222.s002.pdf]
